# Supplementary material
Source: PubMed Central journal article supplement (PMC4524118)
Supplement: MCB.00048-15_zmb999100899so1.pdf [file MCB.00048-15_zmb999100899so1.pdf]

Supplemental Figure 1

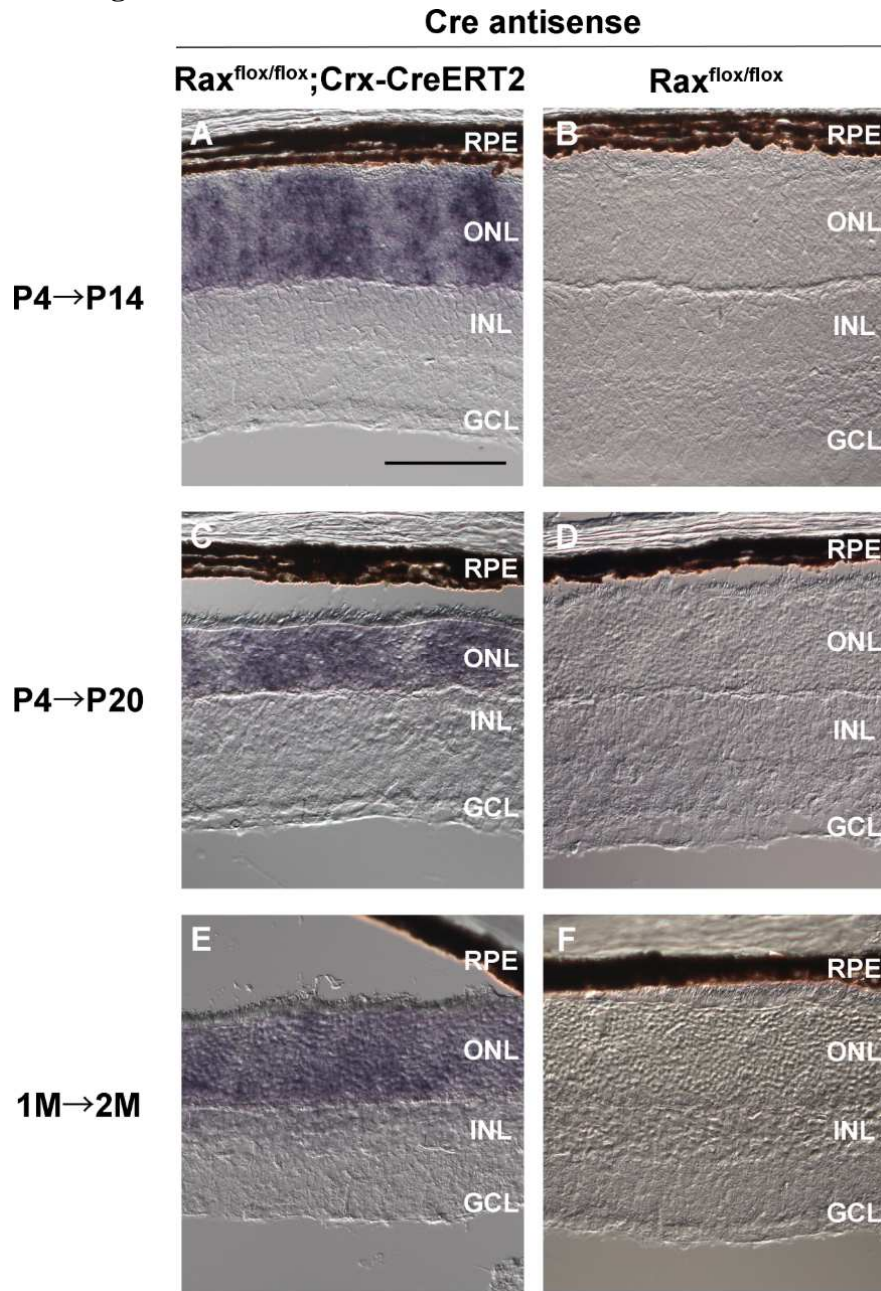

**FIG S1** Spatial and temporal expression of *CreERT2* in the *Rax<sup>flox/flox</sup>;Crx-CreERT2* retina and *Rax<sup>flox/flox</sup>* retina with tamoxifen.

(A to F) *In situ* hybridization of sections from the *Rax<sup>flox/flox</sup>;Crx-CreERT2* retina with tamoxifen (A, C and E) or *Rax<sup>flox/flox</sup>* retina with tamoxifen (B, D and F) probed with an antisense RNA against *Cre*. Tamoxifen was administered to mice at P4 or 1M, and harvested at P14 (A and B, P4→P14), at P20 (C and D, P4→P20) or at 2M (E and F, 1M→2M). Scale bar represents 100  $\mu$ m. GCL, ganglion cell layer; INL, inner nuclear layer; ONL, outer nuclear layer; RPE, retinal pigment epithelium.
